# Supplementary material for: Parallel electric fields produced by the ionospheric injection
Source: Copernicus journal article supplement (doi:10.5194/angeo-2023-1), 2023-01-12
Supplement: Supplementary file [file angeo-2023-1-AC3-supplement.pdf]

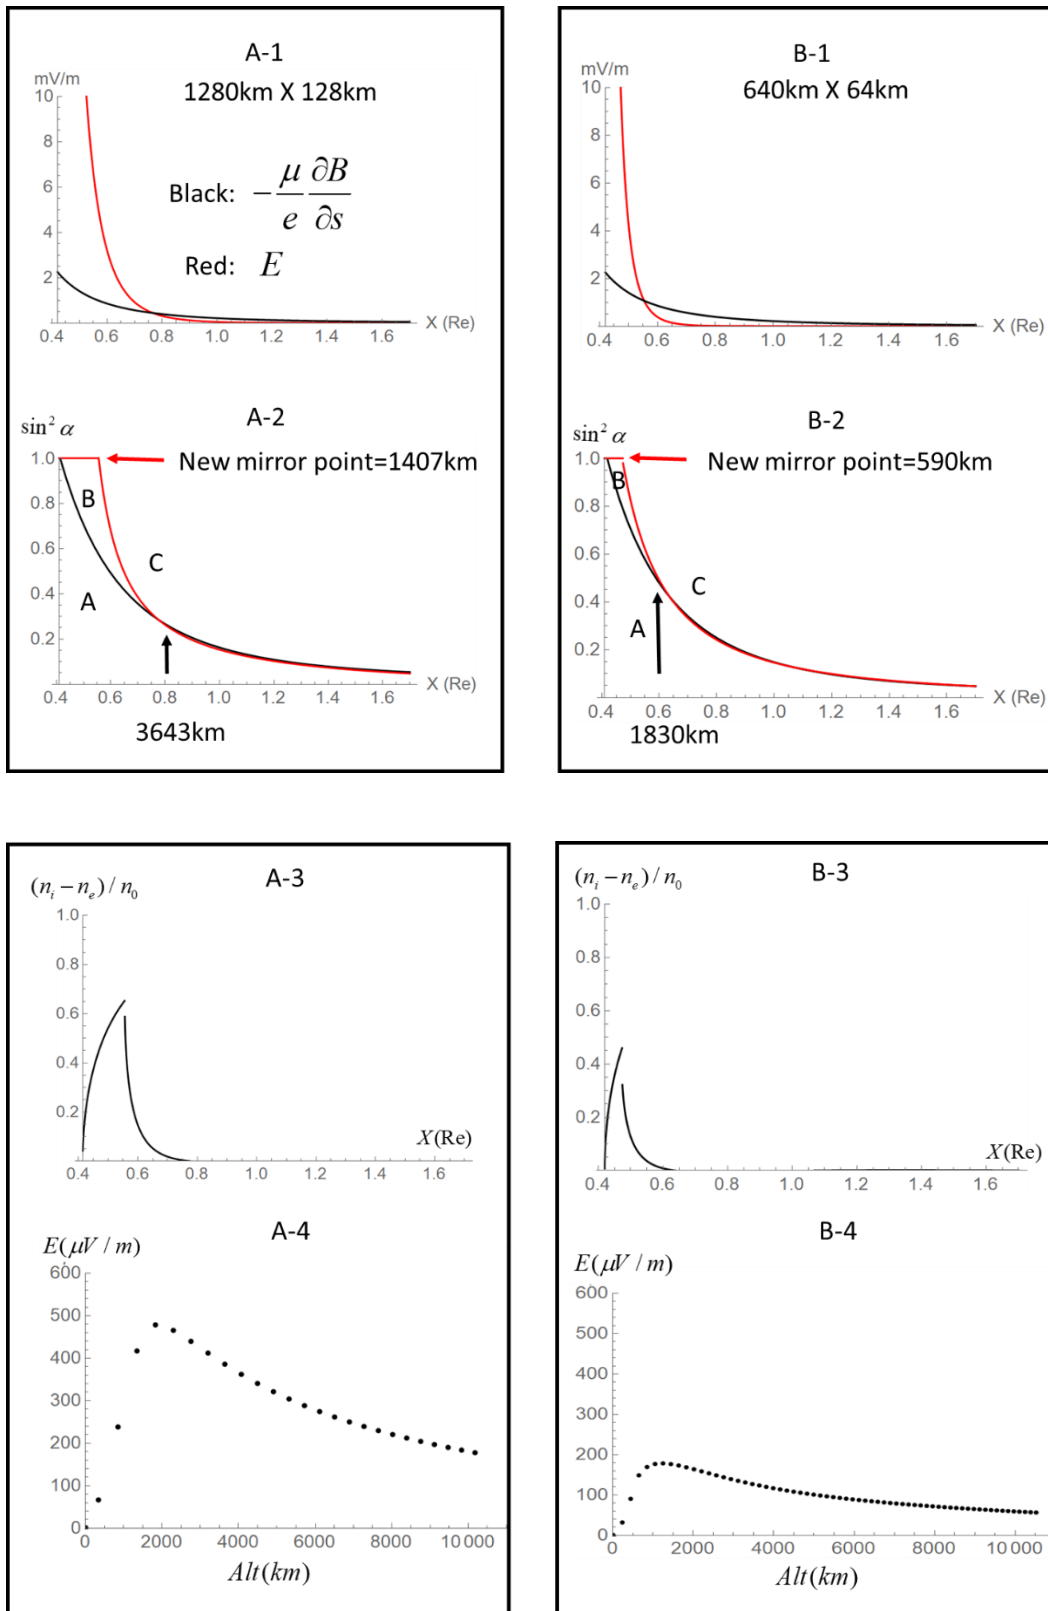

Figure 1

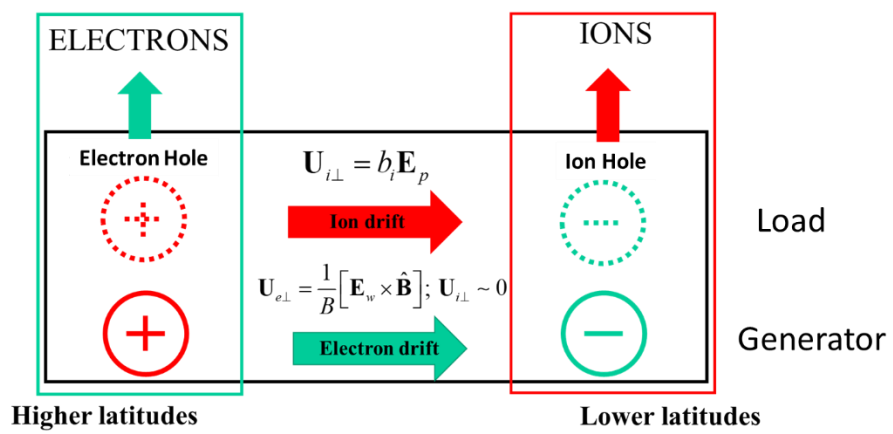

Figure 2
